# Supplementary material for: Synthesis, Biomacromolecular Interactions, Photodynamic NO Releasing and Cellular Imaging of Two [RuCl(qn)(Lbpy)(NO)]X Complexes
Source: MDPI journal article supplement (doi:10.3390/molecules26092545), 2021-04-27
Supplement: s1 [file s1]

## Supporting Information

Synthesis, characterization, biomarcomolecular interactions, photodynamic NO releasing and cellular imaging of two [RuCl(qn)(Lbpy)(NO)]X complexes

Luna Song <sup>1,2</sup>, Hehe Bai <sup>1,2</sup>, Chenyang Liu <sup>1</sup>, Wenjun Gong <sup>1</sup>,  
Ai Wang <sup>1</sup>, Li Wang <sup>2</sup>, Yi Zhao <sup>3</sup>, Xuan Zhao <sup>4</sup>, Hongfei Wang <sup>1,2</sup>\*

<sup>1</sup> Key Laboratory of Chemical Biology and Molecular Engineering of the Education Ministry,  
Institute of Molecular Science, Shanxi University, Taiyuan 030006, China

<sup>2</sup> Institute of Environmental Science, College of Chemistry and Chemical Engineering, Shanxi  
University, Taiyuan 030006, China

<sup>3</sup> Shanxi Key Laboratory of Pharmaceutical Biotechnology, Taiyuan 030006, China

<sup>4</sup> Department of Chemistry, University of Memphis, Memphis, TN 38152, USA

## Table of Contents

|                                                                                                                        |    |
|------------------------------------------------------------------------------------------------------------------------|----|
| <b>Figure S1.</b> $^1\text{H}$ NMR of Ru-Lbpy <sub>1</sub> .....                                                       | 3  |
| <b>Figure S2.</b> $^1\text{H}$ NMR of Lbpy <sub>2</sub> .....                                                          | 4  |
| <b>Figure S3.</b> $^1\text{H}$ NMR of Ru-Lbpy <sub>2</sub> .....                                                       | 5  |
| <b>Figure S4.</b> ESI-MS of Ru-Lbpy <sub>1</sub> .....                                                                 | 6  |
| <b>Figure S5.</b> ESI-MS of Ru-Lbpy <sub>2</sub> .....                                                                 | 6  |
| <b>Figure S6.</b> UV-vis of Lbpy <sub>1</sub> and Ru-Lbpy <sub>1</sub> .....                                           | 7  |
| <b>Figure S7.</b> UV-vis of Lbpy <sub>2</sub> and Ru-Lbpy <sub>2</sub> .....                                           | 7  |
| <b>Figure S8.</b> IR (KBr pellet) of Ru-Lbpy <sub>1</sub> .....                                                        | 8  |
| <b>Figure S9.</b> IR (KBr pellet) of Ru-Lbpy <sub>2</sub> .....                                                        | 8  |
| <b>Figure S10.</b> Hela cells viability treated with Ru-Lbpy <sub>1</sub> and Ru-Lbpy <sub>2</sub> .....               | 9  |
| <b>Table S1.</b> Crystal atomic coordinates and equivalent isotropic temperature factors of Ru-Lbpy <sub>2</sub> ..... | 10 |
| <b>Table S2.</b> Crystal anisotropic displacement parameters of Ru-Lbpy <sub>2</sub> .....                             | 12 |

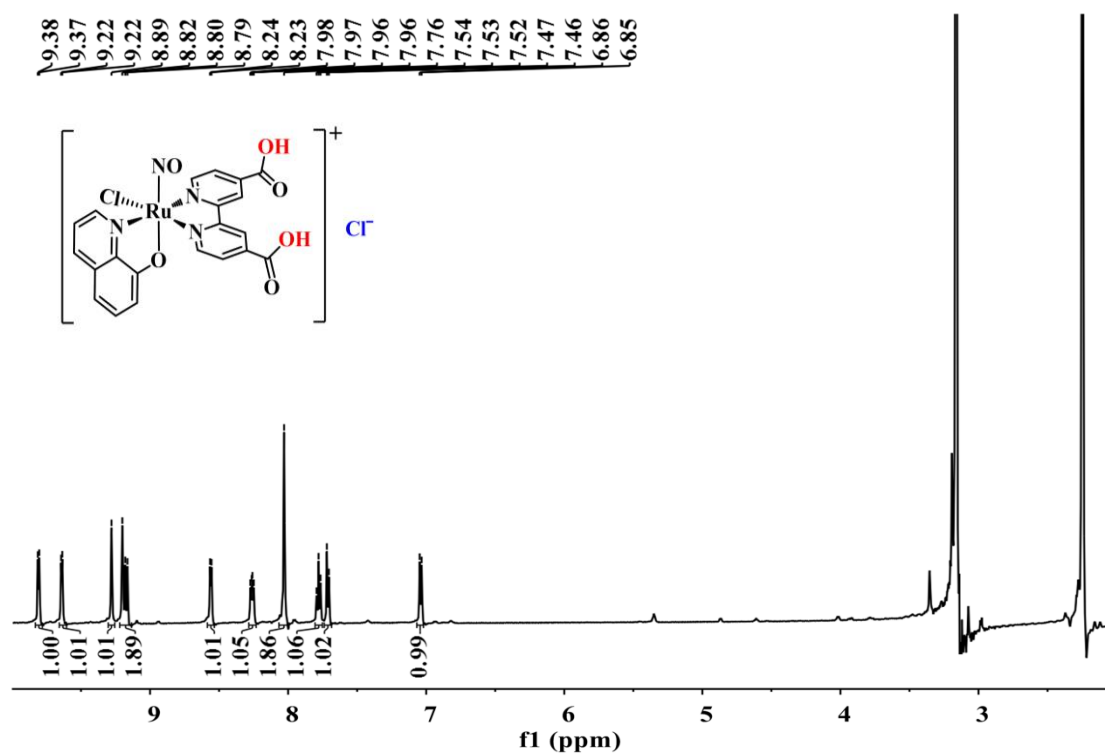

**Figure S1.**  $^1\text{H}$  NMR of  $[\text{RuCl}(\text{qn})(\text{Lbpy}_1)(\text{NO})]\text{Cl}$  (Ru-Lbpy<sub>1</sub>)

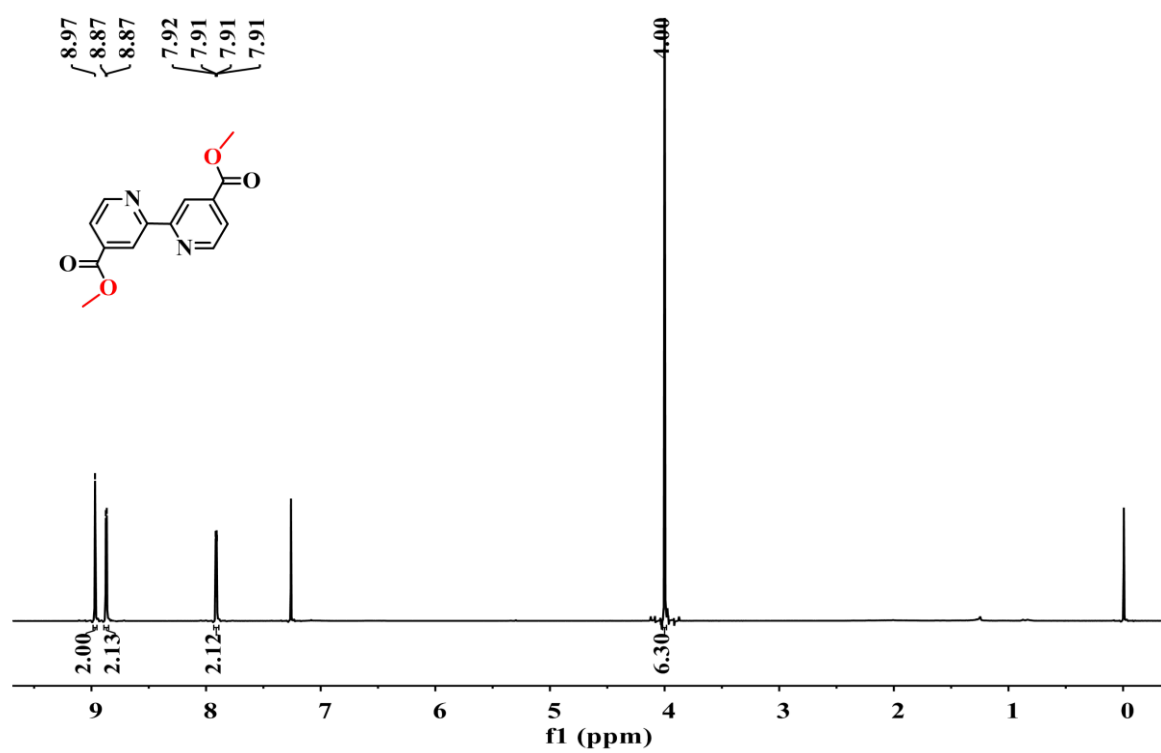

**Figure S2.**  $^1\text{H}$  NMR of 4,4'-dimethoxycarbonyl-2,2'-dipyridine (Lbpy<sub>2</sub>)

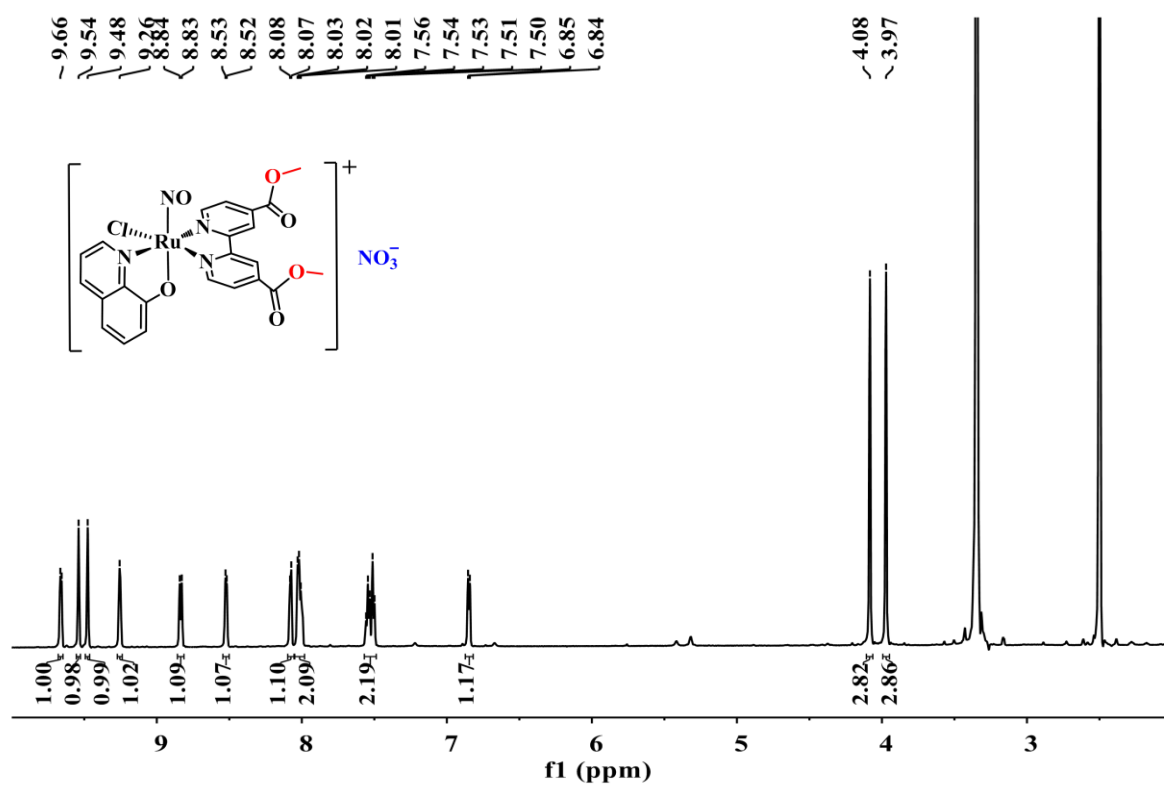

**Figure S3.**  $^1\text{H}$  NMR of  $[\text{RuCl}(\text{qn})(\text{Lbpy}_2)(\text{NO})]\text{NO}_3$  (Ru-Lbpy<sub>2</sub>)

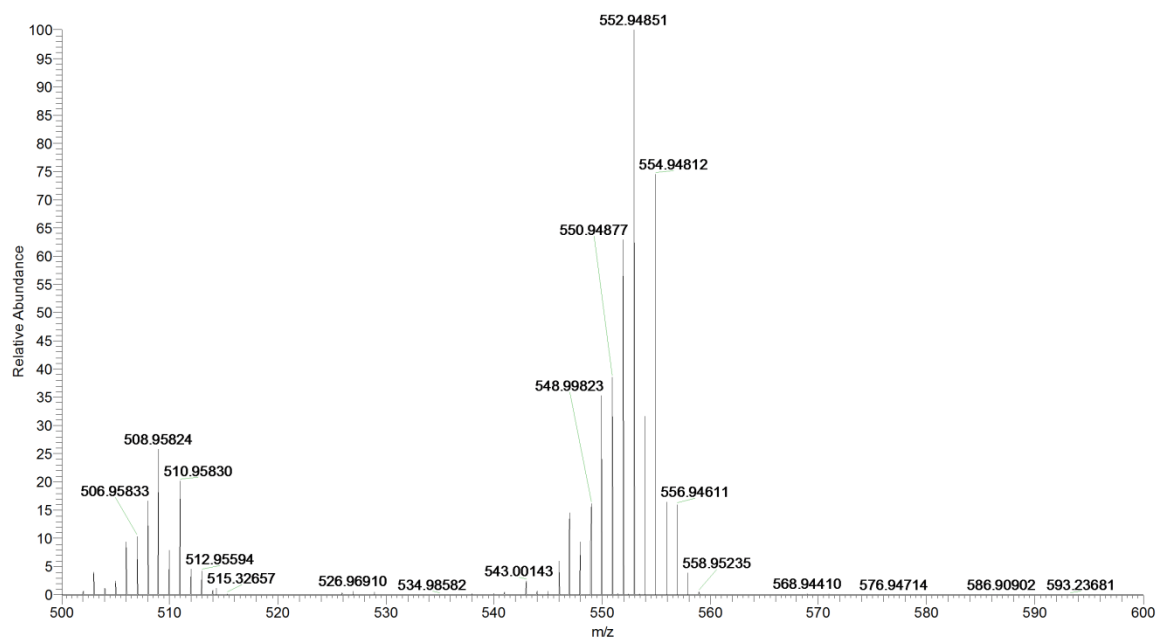

**Figure S4.** ESI-MS of [RuCl(qn)(Lbpy<sub>1</sub>)(NO)]Cl (Ru-Lbpy<sub>1</sub>)

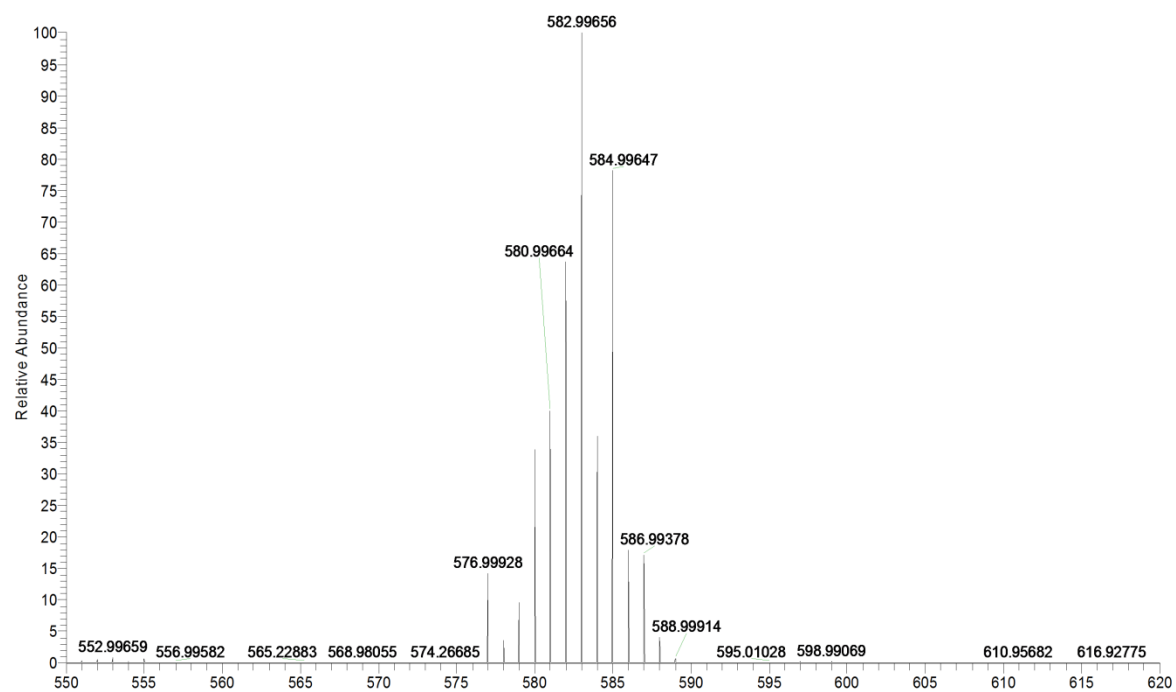

**Figure S5.** ESI-MS of [RuCl(qn)(Lbpy<sub>2</sub>)(NO)]NO<sub>3</sub> (Ru-Lbpy<sub>2</sub>)

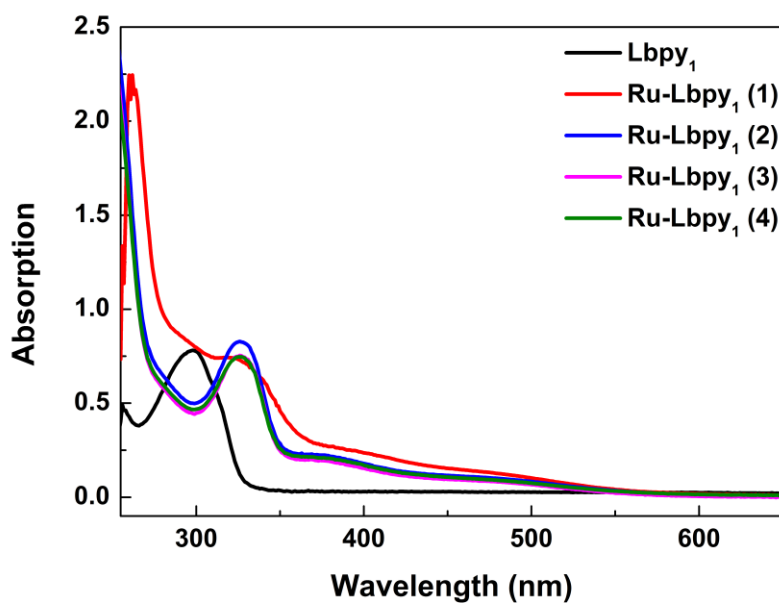

**Figure S6.** UV-vis of Lbpy<sub>1</sub> in DMSO and [RuCl(qn)(Lbpy<sub>1</sub>)(NO)]Cl (Ru-Lbpy<sub>1</sub>)

in (1) DMSO, (2) H<sub>2</sub>O, (3) 50 mM PB, pH=7.5 buffer, (4) 50 mM PB, pH=7.5 buffer in a week.

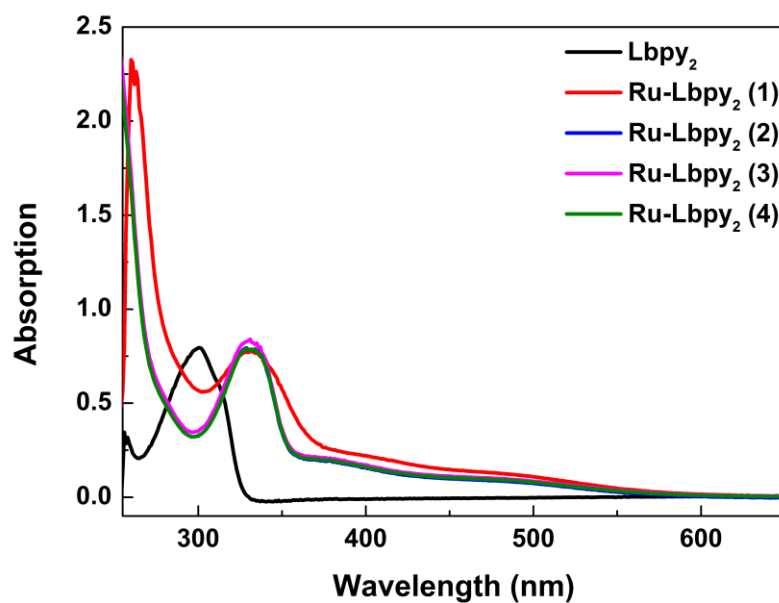

**Figure S7.** UV-vis of Lbpy<sub>2</sub> in DMSO and [RuCl(qn)(Lbpy<sub>2</sub>)(NO)]NO<sub>3</sub> (Ru-Lbpy<sub>2</sub>)

in (1) DMSO, (2) H<sub>2</sub>O, (3) 50 mM PB, pH=7.5 buffer, (4) 50 mM PB, pH=7.5 buffer in a week.

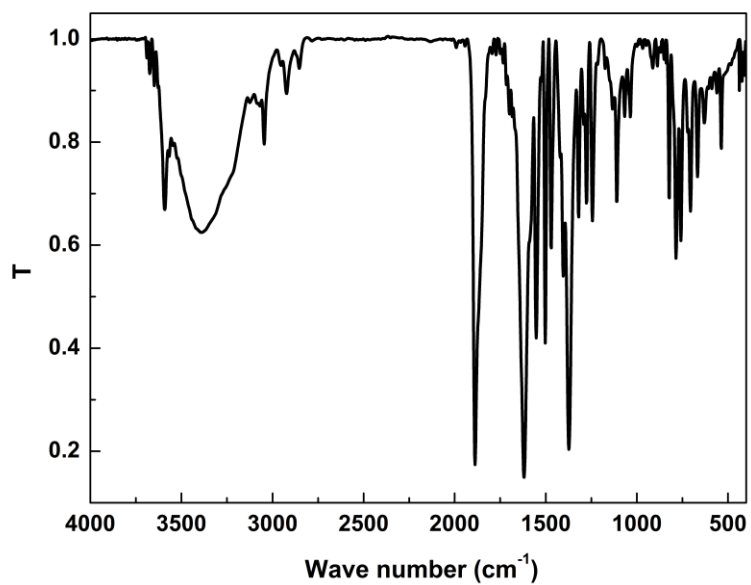

**Figure S8.** IR of  $[\text{RuCl}(\text{qn})(\text{Lbpy}_1)(\text{NO})]\text{Cl}$  (Ru-Lbpy<sub>1</sub>)

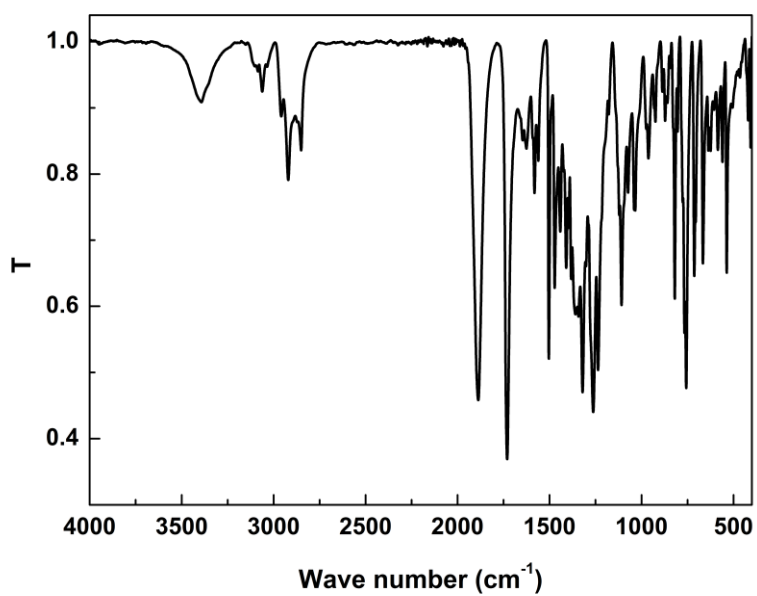

**Figure S9.** IR of  $[\text{RuCl}(\text{qn})(\text{Lbpy}_2)(\text{NO})]\text{NO}_3$  (Ru-Lbpy<sub>2</sub>)



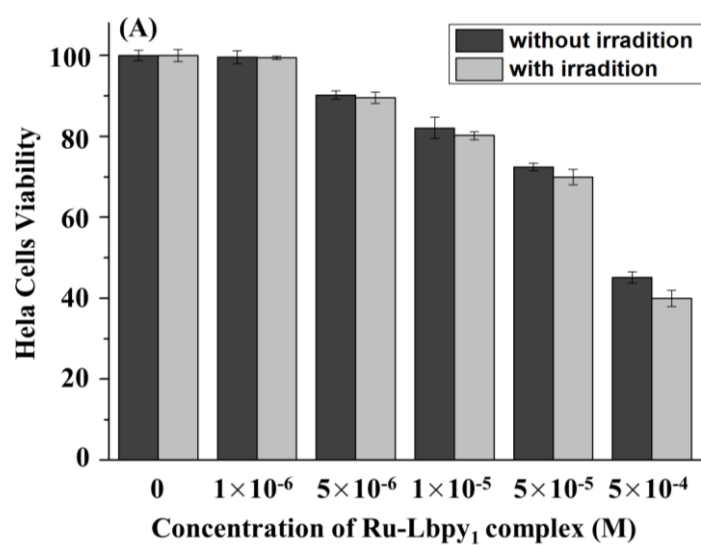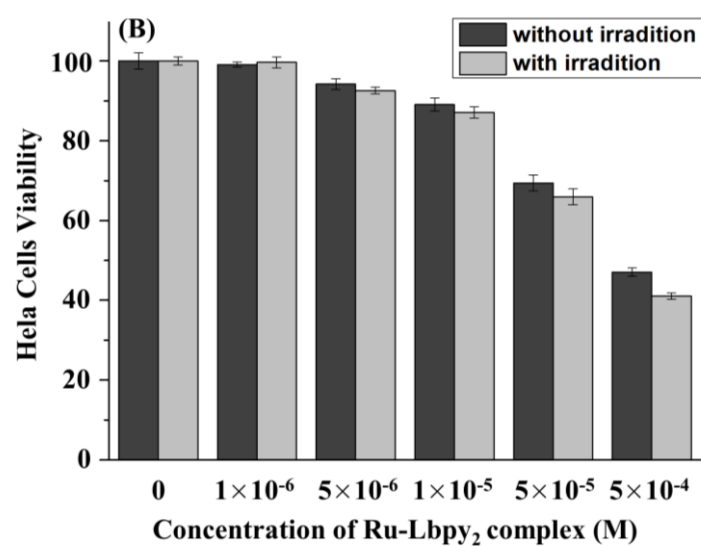

**Figure S10.** Viability of Hela cells treated with different concentrations of Ru-Lbpy<sub>1</sub> (A) and Ru-Lbpy<sub>2</sub> (B) complexes for 24 h. The black and gray represent dark condition and light for 30 min, respectively. Each experiment was repeated at least three times.

**Table S1.** Crystal atomic coordinates and equivalent isotropic temperature factors of Ru-Lbpy<sub>2</sub>

|            | <b>x</b>    | <b>y</b>    | <b>z</b>    | <b>U<sub>iso</sub></b> |
|------------|-------------|-------------|-------------|------------------------|
| <b>Ru1</b> | 0.43083(5)  | 0.31373(5)  | 0.21151(4)  | 0.03568(19)            |
| <b>Cl1</b> | 0.32859(17) | 0.35355(18) | 0.05295(15) | 0.0526(5)              |
| <b>N1</b>  | 0.6344(5)   | 0.4025(5)   | 0.2167(4)   | 0.0375(12)             |
| <b>N2</b>  | 0.5349(5)   | 0.2674(5)   | 0.3367(4)   | 0.0368(12)             |
| <b>N3</b>  | 0.2353(5)   | 0.1849(5)   | 0.1922(4)   | 0.0357(12)             |
| <b>N4</b>  | 0.4237(5)   | 0.4512(6)   | 0.3061(5)   | 0.0476(14)             |
| <b>N5</b>  | 0.2004(10)  | 0.3313(9)   | 0.4935(4)   | 0.088(2)               |
| <b>O1</b>  | 1.0878(5)   | 0.6091(6)   | 0.1688(5)   | 0.0682(16)             |
| <b>O2</b>  | 1.1368(6)   | 0.5170(7)   | 0.2889(6)   | 0.089(2)               |
| <b>O3</b>  | 0.8964(6)   | 0.1791(6)   | 0.5658(5)   | 0.0735(17)             |
| <b>O4</b>  | 0.7132(6)   | 0.0906(6)   | 0.6169(5)   | 0.0704(16)             |
| <b>O5</b>  | 0.4364(4)   | 0.1524(4)   | 0.1112(3)   | 0.0395(10)             |
| <b>O6</b>  | 0.4237(6)   | 0.5384(6)   | 0.3677(6)   | 0.094(2)               |
| <b>O7</b>  | 0.6627(17)  | 0.8743(17)  | 0.3709(12)  | 0.106(7)               |
| <b>O7'</b> | 0.591(3)    | 0.766(3)    | 0.317(2)    | 0.133(13)              |
| <b>O8</b>  | 0.1047(8)   | 0.3643(7)   | 0.4742(6)   | 0.102(2)               |
| <b>O9</b>  | 0.1833(12)  | 0.2157(12)  | 0.4848(9)   | 0.169(4)               |
| <b>O10</b> | 0.3177(15)  | 0.4218(14)  | 0.5186(10)  | 0.073(6)               |
| <b>O11</b> | 0.2592(14)  | 0.3544(14)  | 0.5960(12)  | 0.118(6)               |
| <b>C1</b>  | 0.6762(7)   | 0.4745(6)   | 0.1554(5)   | 0.0439(16)             |
| <b>C2</b>  | 0.8118(7)   | 0.5234(6)   | 0.1594(5)   | 0.0432(16)             |
| <b>C3</b>  | 0.9097(6)   | 0.4983(6)   | 0.2280(5)   | 0.0390(15)             |
| <b>C4</b>  | 0.8673(6)   | 0.4266(6)   | 0.2924(5)   | 0.0375(14)             |
| <b>C5</b>  | 0.7293(6)   | 0.3779(6)   | 0.2858(5)   | 0.0340(14)             |
| <b>C6</b>  | 0.6727(6)   | 0.3020(6)   | 0.3520(5)   | 0.0325(13)             |
| <b>C7</b>  | 0.7528(7)   | 0.2666(6)   | 0.4263(5)   | 0.0398(15)             |
| <b>C8</b>  | 0.6883(7)   | 0.1971(6)   | 0.4853(5)   | 0.0426(16)             |
| <b>C9</b>  | 0.5495(7)   | 0.1680(7)   | 0.4719(6)   | 0.0454(16)             |
| <b>C10</b> | 0.4747(7)   | 0.2042(6)   | 0.3964(5)   | 0.0420(15)             |

|            |            |            |            |             |
|------------|------------|------------|------------|-------------|
| <b>C11</b> | 1.0582(7)  | 0.5414(6)) | 0.2324(6)  | 0.0428(16)  |
| <b>C12</b> | 1.2305(9)  | 0.6505(10) | 0.1653(9)  | 0.085(3)    |
| <b>C13</b> | 0.7658(8)  | 0.1500(7)  | 0.5640(6)  | 0.0504(18)  |
| <b>C14</b> | 0.9767(9)  | 0.1280(10) | 0.6339(8)  | 0.091(3)    |
| <b>C15</b> | 0.3221(6)  | 0.0472(6)  | 0.0805(5)  | 0.0384(15)  |
| <b>C16</b> | 0.3023(8)  | -0.0734(7) | 0.0103(6)  | 0.0507(18)  |
| <b>C17</b> | 0.1768(9)  | -0.1786(7) | -0.0162(6) | 0.059(2)    |
| <b>C18</b> | 0.0710(8)  | -0.1670(7) | 0.0249(6)  | 0.059(2)    |
| <b>C19</b> | 0.0864(7)  | -0.0445(7) | 0.0970(6)  | 0.0458(17)  |
| <b>C20</b> | 0.2127(6)  | 0.0614(6)  | 0.1240(5)  | 0.0366(14)  |
| <b>C21</b> | 0.1382(7)  | 0.2054(7)  | 0.2351(6)  | 0.0464(16)  |
| <b>C22</b> | 0.0119(8)  | 0.1034(9)  | 0.2119(6)  | 0.057(2)    |
| <b>C23</b> | -0.0138(7) | -0.0184(8) | 0.1443(6)  | -0.0522(19) |
| <b>C24</b> | 0.5905(14) | 0.8996(14) | 0.2023(12) | 0.132(5)    |
| <b>C25</b> | 0.6431(17) | 0.8304(19) | 0.2562(13) | 0.148(6)    |

---

**Table S2.** Crystal anisotropic displacement parameters of Ru-Lbpy<sub>2</sub>

|            | <b>U11</b> | <b>U22</b> | <b>U33</b> | <b>U23</b> | <b>U13</b> | <b>U12</b> |
|------------|------------|------------|------------|------------|------------|------------|
| <b>Ru1</b> | 0.0297(3)  | 0.0334(3)  | 0.0381(3)  | 0.0128(2)  | 0.0005(2)  | 0.0099(2)  |
| <b>Cl1</b> | 0.0405(9)  | 0.0602(11) | 0.0528(10) | 0.0291(9)  | -0.0011(8) | 0.0146(8)  |
| <b>N1</b>  | 0.028(3)   | 0.033(3)   | 0.044(3)   | 0.017(2)   | 0.000(2)   | 0.005(2)   |
| <b>N2</b>  | 0.034(3)   | 0.036(3)   | 0.035(3)   | 0.011(2)   | 0.004(2)   | 0.011(2)   |
| <b>N3</b>  | 0.031(3)   | 0.038(3)   | 0.037(3)   | 0.016(2)   | 0.005(2)   | 0.011(2)   |
| <b>N4</b>  | 0.034(3)   | 0.043(4)   | 0.053(4)   | 0.008(3)   | -0.003(3)  | 0.014(3)   |
| <b>N5</b>  | 0.089(3)   | 0.087(3)   | 0.089(3)   | 0.0289(19) | 0.0243(19) | 0.038(2)   |
| <b>O1</b>  | 0.049(3)   | 0.093(4)   | 0.097(4)   | 0.070(4)   | 0.033(3)   | 0.034(3)   |
| <b>O2</b>  | 0.051(3)   | 0.133(6)   | 0.127(5)   | 0.103(5)   | 0.032(4)   | 0.038(4)   |
| <b>O3</b>  | 0.055(3)   | 0.095(4)   | 0.093(4)   | 0.072(4)   | 0.013(3)   | 0.031(3)   |
| <b>O4</b>  | 0.060(3)   | 0.086(4)   | 0.072(4)   | 0.058(3)   | 0.012(3)   | 0.015(3)   |
| <b>O5</b>  | 0.029(2)   | 0.038(2)   | 0.046(3)   | 0.010(2)   | 0.0099(19) | 0.0091(19) |
| <b>O6</b>  | 0.071(4)   | 0.073(4)   | 0.095(5)   | -0.022(4)  | -0.008(3)  | 0.036(3)   |
| <b>O7</b>  | 0.111(7)   | 0.109(8)   | 0.105(7)   | 0.040(4)   | 0.032(4)   | 0.048(4)   |
| <b>O7'</b> | 0.132(13)  | 0.136(13)  | 0.132(13)  | 0.050(6)   | 0.041(5)   | 0.047(6)   |
| <b>O8</b>  | 0.098(4)   | 0.115(4)   | 0.103(4)   | 0.037(3)   | 0.031(3)   | 0.052(3)   |
| <b>O9</b>  | 0.170(4)   | 0.168(4)   | 0.171(4)   | 0.065(2)   | 0.050(2)   | 0.062(2)   |
| <b>O10</b> | 0.070(6)   | 0.072(6)   | 0.075(6)   | 0.024(3)   | 0.020(3)   | 0.027(3)   |
| <b>O11</b> | 0.117(6)   | 0.117(6)   | 0.118(6)   | 0.039(3)   | 0.033(3)   | 0.047(3)   |
| <b>C1</b>  | 0.037(4)   | 0.042(4)   | 0.047(4)   | 0.024(3)   | -0.003(3)  | 0.009(3)   |
| <b>C2</b>  | 0.042(4)   | 0.041(4)   | 0.044(4)   | 0.024(3)   | 0.003(3)   | 0.011(3)   |
| <b>C3</b>  | 0.040(4)   | 0.033(3)   | 0.041(4)   | 0.015(3)   | 0.009(3)   | 0.009(3)   |
| <b>C4</b>  | 0.034(3)   | 0.037(3)   | 0.038(3)   | 0.015(3)   | 0.015(3)   | 0.015(3)   |
| <b>C5</b>  | 0.035(3)   | 0.030(3)   | 0.031(3)   | 0.011(3)   | 0.002(3)   | 0.009(3)   |
| <b>C6</b>  | 0.032(3)   | 0.030(3)   | 0.029(3)   | 0.009(3)   | 0.000(2)   | 0.009(3)   |
| <b>C7</b>  | 0.034(3)   | 0.040(4)   | 0.041(4)   | 0.016(3)   | 0.004(3)   | 0.011(3)   |
| <b>C8</b>  | 0.046(4)   | 0.038(4)   | 0.039(4)   | 0.019(3)   | 0.004(3)   | 0.010(3)   |
| <b>C9</b>  | 0.040(4)   | 0.050(4)   | 0.046(4)   | 0.026(3)   | 0.010(3)   | 0.011(3)   |

|            |           |           |           |           |           |           |
|------------|-----------|-----------|-----------|-----------|-----------|-----------|
| <b>C10</b> | 0.036(4)  | 0.046(4)  | 0.045(4)  | 0.020(3)  | 0.009(3)  | 0.015(3)  |
| <b>C11</b> | 0.043(4)  | 0.044(4)  | 0.051(4)  | 0.029(3)  | 0.013(3)  | 0.019(3)  |
| <b>C12</b> | 0.062(6)  | 0.111(8)  | 0.127(8)  | 0.084(7)  | 0.053(6)  | 0.041(5)  |
| <b>C13</b> | 0.047(4)  | 0.046(4)  | 0.049(4)  | 0.022(4)  | 0.000(3)  | 0.009(3)  |
| <b>C14</b> | 0.066(6)  | 0.125(8)  | 0.109(8)  | 0.089(7)  | 0.009(5)  | 0.041(6)  |
| <b>C15</b> | 0.033(3)  | 0.038(4)  | 0.039(4)  | 0.016(3)  | 0.002(3)  | 0.010(3)  |
| <b>C16</b> | 0.058(5)  | 0.041(4)  | 0.050(4)  | 0.015(3)  | 0.009(3)  | 0.019(3)  |
| <b>C17</b> | 0.071(5)  | 0.036(4)  | 0.052(5)  | 0.012(3)  | 0.002(4)  | 0.011(4)  |
| <b>C18</b> | 0.054(5)  | 0.044(5)  | 0.058(5)  | 0.024(4)  | -0.005(4) | 0.001(3)  |
| <b>C19</b> | 0.040(4)  | 0.049(4)  | 0.044(4)  | 0.028(3)  | -0.002(3) | 0.009(3)  |
| <b>C20</b> | 0.033(3)  | 0.037(4)  | 0.034(3)  | 0.016(3)  | -0.002(3) | 0.009(3)  |
| <b>C21</b> | 0.048(4)  | 0.056(4)  | 0.045(4)  | 0.025(3)  | 0.015(3)  | 0.027(4)  |
| <b>C22</b> | 0.045(4)  | 0.090(6)  | 0.060(5)  | 0.047(5)  | 0.025(4)  | 0.031(4)  |
| <b>C23</b> | 0.028(4)  | 0.066(5)  | 0.058(5)  | 0.038(4)  | 0.001(3)  | 0.004(3)  |
| <b>C24</b> | 0.128(11) | 0.162(13) | 0.145(12) | 0.095(11) | 0.047(9)  | 0.067(10) |
| <b>C25</b> | 0.151(13) | 0.214(17) | 0.146(14) | 0.112(14) | 0.062(11) | 0.106(13) |

---
